# Supplementary material for: Oxygen vacancy confined nickel cobaltite nanostructures as an excellent interface for the enzyme-free electrochemical sensing of extracellular H2O2 secreted from live cells
Source: Royal Society of Chemistry journal article supplement (doi:10.1039/d0nj03281f), 2020-01-01
Supplement: d0nj03281f1.pdf [file d0nj03281f1.pdf]

## Appendix A. Supplementary material

### **Oxygen vacancies confined nickel cobaltite nanostructures as an excellent interface for enzyme-free electrochemical sensing of extracellular H<sub>2</sub>O<sub>2</sub> secreted from live cells**

Paramasivam Balasubramanian,<sup>a1</sup> Shao-Bin He,<sup>a1</sup> Arumugam Jansirani,<sup>a</sup> Hao-Hua Deng,<sup>a</sup> Hua-Ping Peng,<sup>a</sup> Xing-Hua Xia,<sup>b</sup> Wei Chen <sup>a\*</sup>

<sup>a</sup> Higher Educational Key Laboratory for Nano Biomedical Technology of Fujian Province, Department of Pharmaceutical Analysis, Fujian Medical University, Fuzhou 350004, China

<sup>b</sup> State Key Laboratory of Analytical Chemistry for Life Science and Collaborative Innovation Center of Chemistry for Life Sciences, School of Chemistry and Chemical Engineering, Nanjing University, Nanjing 210093, China

<sup>1</sup> Shao-Bin He and Paramasivam Balasubramanian contributed equally to this work.

\* Corresponding author. Tel./fax: +86 591 22862016.

E-mail address: chenandhu@163.com (W. Chen)

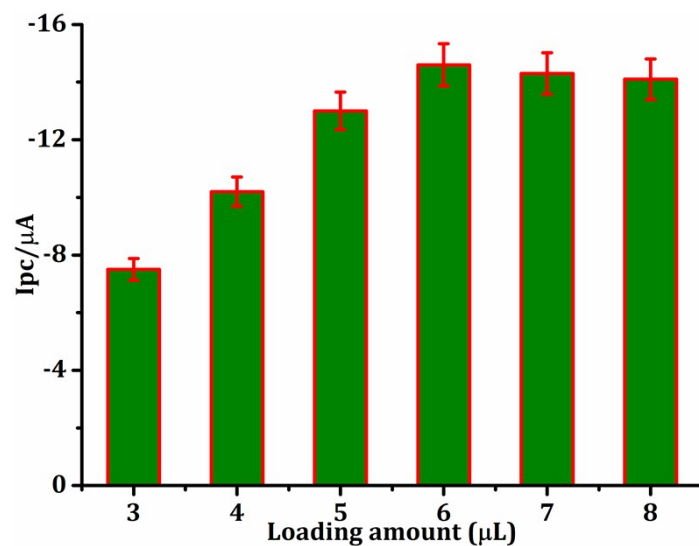

Fig. S1. Effect of O<sub>V</sub>-NCO loading on GCE surface corresponding to cathodic peak current response of 1 mM H<sub>2</sub>O<sub>2</sub>.

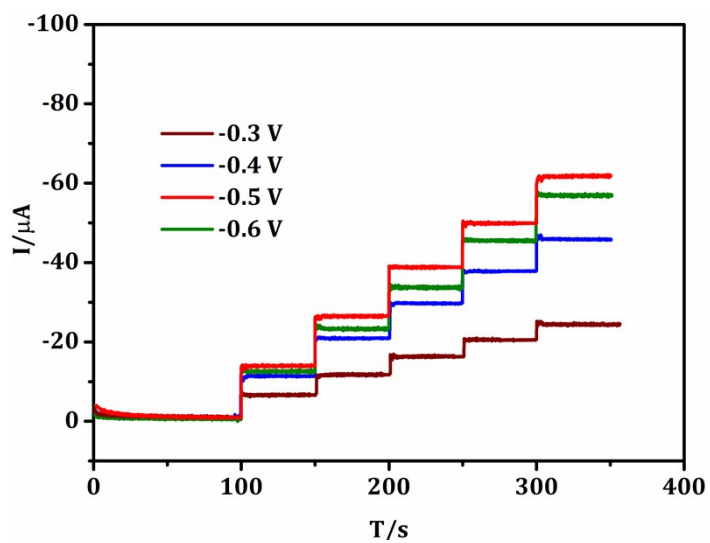

Fig. S2. Amperometric current response of O<sub>V</sub>-NCO/RDE at various operating potentials in 0.05 M PBS (pH 7) under consecutive injection of H<sub>2</sub>O<sub>2</sub> (1 mM).
